# Supplementary material
Source: PubMed Central journal article supplement (PMC5442612)
Supplement: IAI.00173-17_zii999092043s1.pdf [file IAI.00173-17_zii999092043s1.pdf]

## **Supplementary material:**

**Supplementary Text 1:** Supplementary materials and methods

**Supplementary Text 2:** Histopathological changes in *Toxoplasma gondii* infected dunnarts at 7 and 14 days p.i. and *Neospora caninum* infected dunnarts at 7 and 13 days p.i.

**Supplementary Figure 1:** Daily activity and food consumption of fat-tailed dunnarts (*Sminthopsis crassicaudata*) during *Neospora caninum* and *Toxoplasma gondii* infection. Data shown are representative of two independent *T. gondii* experiments (Tg1: A, E, I; Tg2: B, F, J) and two independent *N. caninum* experiments (Nc1: C, G, K; Nc2: D, H, L). Activity and food consumption of all experimental animals was individually monitored and is presented as a daily sum. Daily activity was measured on an exercise wheel equipped with a wheel odometer that translated the number of revolutions in 24 hours into distance in kilometers (C, D, I, J) and time spent in the wheel (A, B, G, H). Food consumption reflects the total grams of food consumed in 24 hours (E, F, K, L). Uninfected control animals are designated by a red line connecting data points.

**Supplementary Table 1:** Summary of parasite infection experiments in the fat-tailed dunnart (*Sminthopsis crassicaudata*)

**Supplementary Table 2:** Oligonucleotide primer sequences used in qPCR in the present study

**Supplementary Table 3:** Optimization values for qPCR assays used in the present study

**Supplementary Table 4:** Summary of histopathology lesion grading scores for inflammation, necrosis, and parasite life stage in *Neospora caninum* and *Toxoplasma gondii* infected fat-tailed dunnarts (*Sminthopsis crassicaudata*)

**Supplementary Table 5.** Summary of parasite tissue load in the brain, tongue, lung, heart, liver, and spleen of fat-tailed dunnarts (*Sminthopsis crassicaudata*) at 7 and 13-14 days postinfection with *Toxoplasma gondii* and *Neospora caninum*. Parasite numbers represent group median values (interquartile range) based on four biological replicates. Data shown are representative of two independent *T. gondii* experiments and two independent *N. caninum* experiments. Abbreviation: p.i., postinfection.

**Supplementary Table 6.** Summary of cytokine mRNA expression (fold change) in fat-tailed dunnarts (*Sminthopsis crassicaudata*) experimentally infected with *Toxoplasma gondii* and *Neospora caninum* at 7 and 13-14 days p.i., determined by qRT-PCR. Cytokine mRNA expression has been normalized to the geometric mean of GAPDH and 28S. Data reflect group median values (interquartile ranges) based on four biological replicates. Data shown are representative of two independent *T. gondii* experiments and two independent *N. caninum* experiments. Control, uninfected dunnarts; p.i., postinfection

1 **SUPPLEMENTARY TEXT S1 Supplementary Materials and Methods**

2

3 **Animal housing.** Animals were housed individually in a temperature controlled  
4 environment (20-22°C) with a 12h light:12 hour dark photocycle, and received fresh  
5 water and mixed cat food (1:2 ratio of moistened Optimum® Furball biscuits: canned  
6 Whiskas® Loaf Lamb with Kidney) *ad libitum*.

7

8 **Preparation of *N. caninum* and *T. gondii* tachyzoites for parasite infection and**  
9 **immunological studies.** Tachyzoites of NC-Nowra isolate of *Neospora caninum* and  
10 TgAuDg1 isolate of *Toxoplasma gondii* were propagated *in vitro* by serial passages at  
11 the University of Sydney (up to 5 and 13 passages for TgAuDg1 and NC-Nowra,  
12 respectively) in African green monkey kidney adherent fibroblast (Vero cell) cultures  
13 under the following conditions. Parasite cultures were maintained in a humidified  
14 incubator at 5% CO<sub>2</sub> and 37°C using Dulbecco's Modified Eagle's Medium High  
15 Glucose (DMEM-HG) (Sigma-Aldrich, Australia) supplemented with 2% heat-inactivated  
16 fetal bovine serum (GIBCO™, ThermoFisher Scientific, Australia) and 1% penicillin-  
17 streptomycin antibiotics (GIBCO™, ThermoFisher Scientific, Australia). Prior to inocula  
18 preparation, parasite cultures were tested for mycoplasma contamination using the  
19 Venor®GeM OneStep *Mycoplasma* Detection Kit for endpoint PCR (Minerva Biolabs,  
20 Biocene, Australia) as per manufacturer's instructions. For inocula preparation, infected  
21 Vero cells were cultured until cytopathic effects were observed in 40-60% of the host  
22 cell monolayer and remaining cells were heavily infected. A cell scraper was used to  
23 harvest adherent infected cells and the supernatant containing free and intracellular

24 tachyzoites was passed through a 26½ gauge needle five times to liberate intracellular  
25 parasites. Tachyzoites were then purified by passage through a sterile 5-µm  
26 nitrocellulose membrane filter (Millipore Corporation, Bedford, MA USA), stained with  
27 0.4% Trypan Blue Solution (GIBCO™, ThermoFischer Scientific, Australia) to assess  
28 viability, counted with a hemocytometer and suspended in sterile phosphate-buffered  
29 solution (PBS) to achieve a concentration of  $3.33 \times 10^5$  viable tachyzoites/ml.  
30 Tachyzoites of NC Nowra isolate of *Neospora caninum* and TgAuDg1 isolate of  
31 *Toxoplasma gondii* are cryopreserved at the University of Technology Sydney (Sydney,  
32 Australia).

33

34 **Tissue sampling and storage.** Animals were necropsied immediately after euthanasia.  
35 Heart blood was collected and allowed to clot before centrifugation at 1,000 x g for 15  
36 min; serum was removed and stored at -20°C until serological analysis. Sterile samples  
37 of brain, lung, heart, liver, spleen, and skeletal muscle were collected in cryovials, and  
38 either flash frozen in liquid nitrogen before storage at -80°C or placed directly into a -  
39 80°C freezer immediately after collection until RNA and DNA isolation. Frozen spleen  
40 samples were later transferred to new tubes containing 1.0 ml RNAlater (Applied  
41 Biosystems, Carlsbad, CA, USA) to stabilize nucleic acids for long term storage, stored  
42 at -4°C overnight and then -20°C after a pilot study determined thawing spleen in  
43 RNAlater had no detrimental effect on subsequent RNA and DNA synthesis. Samples of  
44 brain, eye, tongue, nasal cavity, salivary gland, thyroid gland, esophagus, trachea,  
45 heart, diaphragm, multiple lymph nodes, usually including thoracic and mediastinal,  
46 mesentery, stomach, duodenum, jejunum, ileum, pancreas, spleen, liver, gall bladder,

47 kidney, ureter, adrenal gland, urinary bladder, reproductive structures (either uterus and  
48 ovary or testicle, epididymis, and prostate gland), forelimb skeletal muscle, elbow joint,  
49 peripheral nerve, bone marrow, and bone were collected and placed in 10% neutral  
50 buffered formalin (pH 7.0) for histopathological assessment. Tissue samples containing  
51 bone were decalcified for 24-28h prior to processing for histopathology.

52

53 **Clinical evaluation of *N. caninum* and *T. gondii* infection.** To assess animal activity  
54 throughout the experiment, animals were monitored using a 24h surveillance system  
55 with infrared capacity to record animal movements. Video footage was reviewed twice  
56 daily to evaluate for clinical manifestations of disease. Additionally, each cage contained  
57 a rodent exercise wheel equipped with an odometer that recorded running time and  
58 distance travelled over a 24h period. Food and water intake were measured daily. Body  
59 mass (g) and tail base width (mm, an indicator of general health for this species) were  
60 monitored throughout the experiment. Data was recorded for each animal for 6-7 days  
61 prior to inoculation in order to obtain a baseline of individual activity and food  
62 consumption. Animals presenting with signs of clinical disease, including excessive  
63 water consumption, decreased appetite and activity, ungroomed pelage, hunched body  
64 posture, and abnormal behavior were removed from their cage and weighed. The  
65 following humane end-points were used to determine the conclusion of the experiment:  
66 20% loss of original body weight, severe dehydration, labored respiration, neurological  
67 clinical signs, obtunded behavior, and urinary incontinence. Animals found to be  
68 meeting any of these criteria were immediately euthanized by CO<sub>2</sub> inhalation. Morbidity

69 scores were assigned to each animal to facilitate statistical analysis as previously  
70 described (1).

71

72 **Pathological analysis.** A complete postmortem exam was performed on each animal  
73 and included assessment of overall body condition, external examination, evaluation of  
74 subcutaneous and visceral adipose tissue stores and skeletal musculature, and  
75 macroscopic examination of thoracic and abdominal organs. Body mass, tail base  
76 measurements, and total spleen weight were recorded.

77         Formalin-fixed and decalcified tissues were processed routinely, embedded in  
78 paraffin wax, and 4- $\mu$ m thick sections were stained with hematoxylin and eosin (H&E)  
79 and evaluated by light microscopy. Results for histopathological analysis of brain,  
80 tongue, lung, heart, liver, and spleen were expressed by score criteria based on a  
81 semiquantitative analysis that evaluated the severity of inflammation and necrosis, and  
82 presence of different parasite life stages. For the evaluated sectional area of a given  
83 tissue, the extent of inflammation and necrosis were scored separately and scoring  
84 ranged from no lesion present (score = 0) to minimal (<5% affected; score = 1), mild (5-  
85 10% affected; score = 2), moderate (11-30% affected; score = 3), or severe (>30%  
86 affected; score = 4). To evaluate for the presence of different parasite life stages,  
87 scoring ranged from none present (score = 0) to tachyzoites only (score = 1), tissue  
88 cysts only (score = 2), or tachyzoites and tissue cysts (score = 3). Criteria were  
89 established in order to distinguish between true tissue cysts and pseudocysts; a tissue  
90 cyst was defined as a discrete intracellular accumulation of zoites not directly  
91 associated with inflammatory infiltrates or necrosis. Tissue cysts identified in H&E

92 sections were confirmed using bradyzoite specific BAG5 IHC. Histopathology was  
93 assessed without prior knowledge of the origin of each tissue. The final histopathology  
94 grading scores for inflammation and necrosis used for data analysis were based on the  
95 averaged scores assigned by two pathologists, including a board-certified veterinary  
96 pathologist. Lesion severity scores for each tissue are based on the sum of the necrosis  
97 and inflammation score.

98 Immunohistochemistry (IHC) was performed on paraffin embedded tissue  
99 sections using rabbit anti-*Toxoplasma gondii* polyclonal serum (RB-282-A1, Thermo  
100 Fischer Scientific, Fremont, CA, USA) and goat anti-*Neospora caninum* polyclonal  
101 serum (210-70-NC, VMRD, Pullman, WA, USA) at a 1:000 and 1:6000 dilutions  
102 respectively using methods described previously (2, 3) with the inclusion of a 20 min  
103 protein blocking step (CANDOR Bioscience GmbH, Wangen, Germany) for *N. caninum*  
104 to diminish nonspecific background staining. Positive controls included feline spinal cord  
105 (*T. gondii*) and fetal white rhinoceros liver (*N. caninum*) containing parasites. To detect  
106 *T. gondii* and *N. caninum* bradyzoites, the polyclonal rabbit antibody anti-TgBAG5 was  
107 used at a 1:300 dilution as previously described (2) with the inclusion of a 20 min  
108 protein blocking step to reduce nonspecific staining. For negative controls, IHC  
109 techniques were applied with omission of the primary antiserum.

110

111 **Quantification of tissue parasite load from *N. caninum* and *T. gondii* infected**  
112 **dunnarts.** For each experimental animal, genomic DNA was extracted from 25mg of  
113 brain (frontal lobe), tongue, lung, heart, liver, and spleen using the Isolate II Genomic  
114 DNA kit (Bioline, Australia) using the recommended manufacturer's protocol for

115 purifying DNA from animal tissue. As a negative DNA extraction control, 25 µl of sterile  
116 distilled water was processed along with all samples. DNA samples were eluted in 100  
117 µl Elution Buffer G with the exception of brain which was eluted in a volume of 60 µl.  
118 DNA was quantified and checked for purity using a NanoDrop ND-1000  
119 Spectrophotometer (ThermoFisher Scientific, Australia), diluted with PCR grade water  
120 to achieve a final concentration of 20 ng/µl, and separated into single use aliquots prior  
121 to storage at -20°C until use. To generate standard curves for parasite quantification  
122 and for use as a positive control, genomic DNA was extracted from known numbers of  
123 *N. caninum* and *T. gondii* tachyzoites using the Isolate II Genomic DNA kit following  
124 manufacturer's protocol.

125 Parasite tissue burden was assessed by quantitative PCR (qPCR) in SYBR  
126 Green based assays targeting the *T. gondii* SAG1 gene (4) and *N. caninum* Nc5 gene  
127 (5) (see Tables S2 and S3 for primer sequences and assay optimization conditions). All  
128 samples were tested in triplicate qPCR reactions containing 10 µl of SsoAdvanced  
129 universal SYBR® Green supermix, either 0.4 µl of each SAG1 primer (20µM) or 1.0 µl  
130 of each Nc5 primer (20µM), 5 µl DNA template (100ng DNA), and PCR grade water to  
131 achieve a final volume of 20 µl. Amplification and data acquisition were carried out in  
132 the CFX96 Touch™ Real-Time PCR Detection System with the corresponding CFX 108  
133 Manager 3.1 software (BioRad, Australia). Amplification cycling conditions were 95°C  
134 for 10 min (activation) followed by 40 cycles of 95°C for 15 s (denaturation) and 60°C for  
135 60 s (annealing and extension). Each run included no-template negative controls, inter-  
136 run calibrators to control for inter-run variation, and a standard curve generated using  
137 10-fold serial dilutions (equivalent of 3 to 3 X 10<sup>5</sup> *T. gondii* parasites or 6 to 6 X 10<sup>5</sup> *N.*



138 *caninum* parasites). A melting curve analysis was acquired for PCR products after  
139 completion of cycling conditions by a pre-melt conditioning step at 55°C for 90 s  
140 followed by stepwise 1 s incremental temperature increases of 1°C from 55°C to 95°C.  
141 Melt curves were visually assessed for all PCR products to confirm the identity of the  
142 desired product and amplification products were randomly selected to confirm amplicon  
143 length using a 1.5% agarose gel stained with GelRed (Biotium, Australia). Calculation of  
144 quantification cycle (Cq) was based on automatic software analysis single baseline  
145 setting parameters. Samples were considered positive if at least 2 of 3 replicates had a  
146 Cq < 36. Any sample with a Cq ≥ 36 was considered negative. Samples with only 1 of 3  
147 replicates registering a Cq < 36 were analyzed again for confirmation and deemed  
148 positive if the same conclusion was reached in the second run. Data handling and  
149 calculations for qPCR data were carried out in qBase<sup>PLUS</sup> Version 3.0 (Biogazelle,  
150 Ghent, Belgium). Raw Cq values were exported to Microsoft excel and uploaded to  
151 qBase<sup>PLUS</sup> where run specific PCR efficiency E was calculated from the standard curve  
152 slope using linear regression and inter-run calibration (IRC) was performed using inter-  
153 run calibrators to correct for inter-run variation prior to analysis (6). Parasites were  
154 quantified in different tissue samples using the average Cq values for each sample by  
155 interpolation of standards of known quantity included with each run to obtain the  
156 calibrated normalized relative quantity (CNRQ) of parasites present in each sample and  
157 expressed as log<sub>10</sub> parasites per 100ng of total DNA. The limit of detection for *N.*  
158 *caninum* and *T. gondii* were < 1 parasite and 2 parasites in 100ng DNA, respectively.

159

160 **Mitogen stimulation of dunnart splenocytes.** The spleen was aseptically collected  
161 from an uninfected control dunnart at necropsy. Single-cell suspensions of spleen cells  
162 (splenocytes) were obtained by gentle tissue extrusion through a 70 µm cell strainer in  
163 the presence of DMEM-HG (Sigma-Aldrich, Australia). Suspended cells were  
164 centrifuged at 800 x g for 5 min, the supernatant aspirated, and cells resuspended in  
165 DMEM and centrifuged again at 800 x g for 5 min. After centrifugation and removal of  
166 supernatant, the cells were resuspended at  $1 \times 10^6$  nucleated cells/ml with DMEM-HG  
167 supplemented with 10% FBS (GIBCO™, ThermoFischer Scientific, Australia), 50 ng/ml  
168 Phorbol myristate acetate (PMA) (Sigma-Aldrich, Australia), and 1 µg/ml Ionomycin  
169 (Sigma-Aldrich, Australia). 1 ml volumes of splenocyte suspensions were incubated in  
170 sealed tubes at 37°C, and 5% CO<sub>2</sub> for 7 h (7, 8). After incubation, splenocytes were  
171 pelleted by centrifugation (900g x 5m), washed twice with warm sterile PBS,  
172 resuspended in RNAlater (Applied Biosystems, Carlsbad, CA, USA), stored overnight at  
173 -4°C and then -20°C for later RNA extraction.

174

175 **Transcriptome generation and analysis.** With the goal of identifying dunnart immune  
176 transcripts for qPCR assay design, four separate transcriptomes were generated using  
177 total RNA isolated from the following samples: (1)  $1 \times 10^6$  mitogen-stimulated  
178 splenocytes from an uninfected dunnart (JS2093), (2) spleen from an uninfected  
179 dunnart (JS1633), (3) spleen from a *N. caninum* infected dunnart at 2 weeks p.i.  
180 (JS2095), and (4) spleen from a *T. gondii* infected dunnart at 2 weeks p.i. (JS2097).  
181 For RNA extraction from mitogen-stimulated splenocytes stored in RNAlater, samples  
182 were centrifuged for 2300 x g for 15m and RNAlater aspirated from the cell pellet. Cells

183 were homogenized by the direct addition of Lysis Buffer RLY and RNA was isolated  
184 using the ISOLATE II RNA Mini Kit (Bioline, Australia) including an on-column DNase I  
185 treatment (supplied in the kit) as per manufacturer's protocol. For RNA extraction from  
186 dunnart spleens, 20 mg of tissue was placed in 2 ml FastPrep® Lysis Bead Matrix D  
187 tubes (MP Biomedicals, LLC, Australia) containing 600 µl Lysis Buffer RLY from the  
188 ISOLATE II RNA Mini Kit and 6µl of β-ME and homogenization was achieved using a  
189 FastPrep®-24 Instrument (MP Biomedicals, USA) for 30 s at 6 m/s. Following  
190 homogenization, samples were centrifuged at 12,000 x g for 5 min and the upper phase  
191 of the lysate was removed and transferred to the ISOLATE II filter from the ISOLATE II  
192 RNA Mini Kit. Remaining RNA isolation including on-column DNase I treatment of RNA  
193 was done using the ISOLATE II RNA Mini Kit following manufacturer's protocol. RNA  
194 samples were eluted in 50 µl RNase-free water. RNA concentration and purity were  
195 determined using a NanoDrop ND-1000 Spectrophotometer (ThermoFisher Scientific,  
196 Australia) and RNA integrity was assessed by chip-based micro-electrophoresis using  
197 an Agilent 2100 Bioanalyzer (Agilent Technologies, Waldbronn, Germany). RNA  
198 samples were transferred into tubes containing RNastable® (Biometrica) and allowed to  
199 dry for 1.5 hours at ambient temperature using a Savant SpeedVac® (ThermoFisher  
200 Scientific, Australia) according to manufacturer's instructions. Illumina HiSeq2000 RNA  
201 sequencing was carried out at Macrogen (Seoul, Korea). Four libraries were generated  
202 and a total of 48.3 – 74.4 million raw sequence reads obtained per library.

203           Read quality was assessed with FastQC using the default parameters before  
204 assembly with Trinity v2.3.2 (9) and filtering for 'good transcripts' with Transrate v1.0.3  
205 (doi:10.1101/gr.196469.115), both using the default parameters. Raw sequence reads

206 from each database were submitted to NCBI SRA under the Bioproject PRJNA356957.  
207 This Transcriptome Shotgun Assembly project has been deposited at  
208 DDBJ/EMBL/GenBank under the accession GFCN00000000. The version described in  
209 this paper is the first version, GFCN01000000. We used Salmon v0.7.2  
210 (<https://combine-lab.github.io/salmon>) to quantify transcripts in each library and  
211 calculate the weighted trimmed mean of the log expression (M) ratios [trimmed mean of  
212 M values (TMM)] (10) for cytokines listed in Table 1, which we identified as the  
213 reciprocal best BLAST hits of orthologs in any marsupial for which sequence was  
214 available, or from human orthologs.

215

#### 216 **Design and validation of qRT-PCR assays to evaluate cytokine expression.**

217 Cytokine transcript sequences for IFN- $\gamma$ , TNF- $\alpha$ , IL-4, IL-17A, and IL-6 obtained from  
218 the dunnart spleen transcriptome were checked for secondary structures using  
219 UNAFold (<http://sg.idtdna.com/UNAFold>) and if present, regions of high secondary  
220 structure were avoided when designing primers. Primers were designed using  
221 Primer3Plus (11) and recommended parameters for designing SYBR® Green primers  
222 (12). Primer sequences were evaluated for interactions, secondary structures, and  
223 specificity against nonspecific marsupial sequences using BeaconDesigner™ Free  
224 Edition Software (<http://www.premierbiosoft.com/qOligo/Oligo.jsp?PID=1>) and NCBI  
225 Primer-BLAST (13). All assays were designed within exons and amplicon length varied  
226 between 91 and 178 base pairs long. Oligonucleotide primers were synthesized by  
227 Macrogen (Korea). Optimal annealing temperatures were determined by gradient PCR  
228 analysis and primers were titrated as needed to diminish primer-dimer formation in no

229 template controls. Amplicon specificity was checked by melt curve analysis,  
230 visualization of a single amplicon on an agarose gel stained with GelRed (Biotium,  
231 Australia), and confirmed by bi-directional sequencing (Macrogen, Korea). Primer  
232 sequences used for 28S and GAPDH reference gene amplification were obtained from  
233 the literature (8, 14) and aligned with dunnart 28S and GAPDH gene sequences to  
234 ensure 100% nucleotide identity using CLC Main Workbench v6.9 (CLCbio, Denmark).  
235 qPCR assays were carried out in the CFX96 Touch™ Real-Time PCR Detection  
236 System (Bio-Rad Laboratories Inc., CA, USA. Triplicate technical replicates were run for  
237 each sample in a final volume of 20 µl with 10 µl of SsoAdvanced universal SYBR®  
238 Green supermix, 1 µl of each primer, 2 µl of cDNA template (1:10 dilution), and 6 µl of  
239 PCR grade water. Cycling conditions included an initial activation step of 95°C for 10m  
240 followed by 40 cycles of denaturation for 15s at 95°C and annealing/extension for 60s at  
241 60°C (57°C for GAPDH and IL-6). Upon completion of PCR cycling, PCR amplification  
242 products were subjected to a melting curve analysis to assess reaction specificity and  
243 confirm identity by verifying specific melting temperature ( $T_m$ ) profiles. The melting  
244 curve analysis was carried out at 52°C to 95°C by increasing the temperature by  
245 1.0°C/1s following a pre-melt conditioning step at 55°C for 90s. Each run included no  
246 template negative controls and no-RT controls.

247 To determine each assay's reaction efficiency, dynamic range, limits of  
248 quantification (LOQ) and detection (LOD), y-intercept, slope, and  $r^2$  calibration curve,  
249 standard curves were established for each cytokine using 10-fold serial dilutions  
250 prepared from purified PCR product quantified by a NanoDrop ND-1000  
251 spectrophotometer (ThermoFisher Scientific, Australia). PCR products were diluted until

252 the standard curve was no longer linear (LOQ) and amplification was no longer detected  
253 (LOD). Efficiency was calculated using the formula  $10^{(-1/\text{slope})} - 1$ . DNA molecule copy  
254 number was calculated from DNA concentration using the following formula: copy  
255 number =  $[\text{ng DNA} \times 6.022 \times 10^{23}] / [\text{amplicon length (bps)} \times 10^9 \text{ ng g}^{-1} \times 660 \text{ g mol}^{-1} \text{ bps}^{-1}]$ .  
256 1].

257

258 **Splenic cytokine mRNA expression by qPCR.** Total RNA was prepared from the  
259 spleens of experimental dunnarts using the Isolate II RNA Mini Kit and homogenization  
260 and extraction techniques and on-column DNase treatment as previously described for  
261 transcriptome generation. RNA samples were stored at  $-80^{\circ}\text{C}$  until cDNA synthesis.  
262 RNA quantity and quality were evaluated by spectrophotometry and Agilent 2100 expert  
263 chip system and RNA extraction was repeated for any sample with RIN  $< 7.5$ . RNA  
264 samples were subjected to an additional DNase treatment using the TURBO DNA-  
265 *free*<sup>TM</sup> Kit (ThermoFisher Scientific, Australia) as per manufacturer's instructions  
266 immediately prior to reverse transcription to eliminate or reduce remaining genomic  
267 DNA contamination to negligible levels. cDNA was synthesized from 2  $\mu\text{g}$  total RNA in a  
268 final volume of 20  $\mu\text{l}$  using the Revertaid First Strand cDNA Synthesis Kit  
269 (ThermoFisher Scientific, Australia) using a 50:50 mixture of random hexamer and  
270 oligo(dT)<sub>18</sub> primers (1  $\mu\text{l}$  each), following the protocol for oligo(dT)<sub>18</sub> synthesis with  
271 inclusion of an initial RNA-primer incubation step at  $65^{\circ}\text{C}$  for 5m to denature RNA prior  
272 to reverse-transcription. Control (no-RT) reactions omitting reverse transcriptase were  
273 prepared at the same time to evaluate RNA samples for genomic DNA (gDNA)  
274 contamination. cDNA synthesis reactions were carried out in a Veriti® Thermal Cycler

275 (ThermoFisher Scientific, Australia). Upon completion of reverse transcription, cDNA  
276 and no-RT controls were diluted 1:10 with RNase/DNase-free water and evaluated by  
277 28S qPCR to assess for gDNA contamination and efficiency of cDNA synthesis. After  
278 evidencing negligible gDNA contamination of samples (i.e., less than 0.1% gDNA  
279 present in RNA ) by demonstrating a difference of >10 cycle thresholds between no-RT  
280 and RT+ samples, cDNA was separated into single-use aliquots and stored at -20°C  
281 until cytokine evaluation. To investigate relative cytokine expression for IFN- $\gamma$ , TNF- $\alpha$ ,  
282 IL-4, IL-17A, and IL-6, qPCR reactions targeting these genes and target reference  
283 genes were carried out in triplicate reactions for each sample using methods described  
284 above. 28S and GAPDH were used as reference genes to normalize the results for  
285 each sample to correct for variations in input RNA due to degradation, extraction  
286 efficiency, and reverse transcription. All samples for a given gene were analyzed in a  
287 single run (sample maximization strategy) to eliminate the need for inter-run calibration.  
288 Raw Cq scores, determined by baseline settings in the CFX 108 Manager 3.1 software  
289 (BioRad, Australia), were uploaded to qBase<sup>PLUS</sup> software where the geometric mean of  
290 GAPDH and 28S was used to normalize expression level of each target transcript in  
291 each sample and 'target specific amplification efficiency' and 'scale to control'  
292 parameters were selected to generate CNRQ value of cytokine expression for each  
293 sample (6). The reference genes GAPDH and 28S have been previously validated for  
294 use in koalas and tammar wallabies and were evaluated for suitability of use in parasite-  
295 infected dunnarts in this study by calculating reference gene stability between treatment  
296 groups using the qBase<sup>PLUS</sup> software (8, 14). The mean geNorm M-value and coefficient  
297 of variation for GAPDH and 28S were found to be equal to 0.734 and 0.257

298 respectively, evidencing their suitability for use as reference genes (M-values <1 and  
299 CV < 0.5 are recommended for reference genes) (6). The assays designed for this  
300 assay were sensitive, reproducible, and all samples tested fell within the linear dynamic  
301 range for all genes assayed with the exception of IL-17A for which several samples  
302 failed to produce a minimum amount of signal to generate a Cq value in all three  
303 triplicate samples (non-detects). Non-detects were handled by setting undetermined  
304 values to the median of the detected replicates or to a maximum Cq value (40) if the  
305 majority were non-detects (15) which equated to less than 1 transcript copy for fold  
306 difference calculations in order to facilitate inclusion of these samples for statistical  
307 analysis. Technical error and RNA degradation were unlikely to have contributed to  
308 failed amplification in these cases because IL-17A mRNA amplification occurred in  
309 other samples included in the same run and RNA quality was high when assessed  
310 using recommended MIQE guidelines (16)

311

## 312 **References**

- 313 1. **Bartley PM, Wright S, Sales J, Chianini F, Buxton D, Innes EA.** 2006. Long-  
314 term passage of tachyzoites in tissue culture can attenuate virulence of  
315 *Neospora caninum* in vivo. *Parasitology* **133**:421-432.
- 316 2. **King JS, McAllan B, Spielman DS, Lindsay SA, Hurkova-Hofmannova L,**  
317 **Hartigan A, Al-Qassab SE, Ellis JT, Slapeta J.** 2011. Extensive production of  
318 *Neospora caninum* tissue cysts in a carnivorous marsupial succumbing to  
319 experimental neosporosis. *Vet Res* **42**:75.



- 320 3. **Lindsay SA, Barrs VR, Child G, Beatty JA, Krockenberger MB.** 2010. Myelitis  
321 due to reactivated spinal toxoplasmosis in a cat. *J Feline Med Surg* **12**:818-821.
- 322 4. **Yu H, Huang B, Zhuo X, Chen X, Du A.** 2013. Evaluation of a real-time PCR  
323 assay based on the single-copy SAG1 gene for the detection of *Toxoplasma*  
324 *gondii*. *Vet Parasitol* **197**:670-673.
- 325 5. **Collantes-Fernandez E, Zaballos A, Alvarez-Garcia G, Ortega-Mora LM.**  
326 2002. Quantitative detection of *Neospora caninum* in bovine aborted fetuses and  
327 experimentally infected mice by real-time PCR. *J Clin Microbiol* **40**:1194-1198.
- 328 6. **Hellemans J, Mortier G, De Paepe A, Speleman F, Vandesompele J.** 2007.  
329 qBase relative quantification framework and software for management and  
330 automated analysis of real-time quantitative PCR data. *Genome Biol* **8**:R19.
- 331 7. **Higgins DP, Hemsley S, Canfield PJ.** 2004. Assessment of anti-bovine IL4 and  
332 IFN gamma antibodies to label IL4 and IFN gamma in lymphocytes of the koala  
333 and brushtail possum. *Vet Immunol Immunopathol* **101**:153-160.
- 334 8. **Maher IE, Griffith JE, Lau Q, Reeves T, Higgins DP.** 2014. Expression profiles  
335 of the immune genes CD4, CD8beta, IFNgamma, IL-4, IL-6 and IL-10 in mitogen-  
336 stimulated koala lymphocytes (*Phascolarctos cinereus*) by qRT-PCR. *PeerJ*  
337 **2**:e280.
- 338 9. **Haas BJ, Papanicolaou A, Yassour M, Grabherr M, Blood PD, Bowden J,**  
339 **Couger MB, Eccles D, Li B, Lieber M, Macmanes MD, Ott M, Orvis J, Pochet**  
340 **N, Strozzi F, Weeks N, Westerman R, William T, Dewey CN, Henschel R,**  
341 **Leduc RD, Friedman N, Regev A.** 2013. De novo transcript sequence

342 reconstruction from RNA-seq using the Trinity platform for reference generation  
343 and analysis. Nat Protoc **8**:1494-1512.

344 10. **Robinson MD, Oshlack A.** 2010. A scaling normalization method for differential  
345 expression analysis of RNA-seq data. Genome Biol **11**:R25.

346 11. **Untergasser A, Nijveen H, Rao X, Bisseling T, Geurts R, Leunissen JA.**  
347 2007. Primer3Plus, an enhanced web interface to Primer3. Nucleic Acids Res  
348 **35**:W71-74.

349 12. **Thornton B, Basu C.** 2011. Real-time PCR (qPCR) primer design using free  
350 online software. Biochem Mol Biol Educ **39**:145-154.

351 13. **Ye J, Coulouris G, Zaretskaya I, Cutcutache I, Rozen S, Madden TL.** 2012.  
352 Primer-BLAST: a tool to design target-specific primers for polymerase chain  
353 reaction. BMC Bioinformatics **13**:134.

354 14. **Daly KA, Mailer SL, Digby MR, Lefevre C, Thomson P, Deane E, Nicholas  
355 KR, Williamson P.** 2009. Molecular analysis of tammar (*Macropus eugenii*)  
356 mammary epithelial cells stimulated with lipopolysaccharide and lipoteichoic acid.  
357 Vet Immunol Immunopathol **129**:36-48.

358 15. **Mar JC, Kimura Y, Schroder K, Irvine KM, Hayashizaki Y, Suzuki H, Hume D,  
359 Quackenbush J.** 2009. Data-driven normalization strategies for high-throughput  
360 quantitative RT-PCR. BMC Bioinformatics **10**:110.

361 16. **Bustin SA, Benes V, Garson JA, Hellemans J, Huggett J, Kubista M, Mueller  
362 R, Nolan T, Pfaffl MW, Shipley GL, Vandesompele J, Wittwer CT.** 2009. The  
363 MIQE guidelines: minimum information for publication of quantitative real-time  
364 PCR experiments. Clin Chem **55**:611-622.

1 **Supplementary Text S2** Histopathological changes in *Toxoplasma gondii* infected  
2 dunnarts at 7 and 14 days p.i. and *Neospora caninum* infected dunnarts at 7 and 13  
3 days p.i.

4  
5 Histopathologic lesions in *T. gondii* infected dunnarts were similar to what has  
6 been described for toxoplasmosis in other species (1) and largely consisted of  
7 nonsuppurative variably neutrophilic inflammation and necrosis in multiple tissues with  
8 the mesentery, lung, and heart being the most severely affected tissues at 14 days p.i.  
9 Tachyzoites were often only identified in IHC stained sections, were more commonly  
10 detected in areas of necrosis and generally associated with neutrophilic infiltrates.  
11 Tissue cysts were uncommon and only found in *T. gondii* infected animals at 14 days  
12 p.i.; presence of tissue cysts was confirmed using *T. gondii* BAG5 IHC. All animals had  
13 granulomatous to pyogranulomatous variably necrotizing peritonitis with intralesional  
14 tachyzoites and occasional extension of inflammatory infiltrates into body wall and  
15 subvertebral skeletal muscle. Severity of peritonitis varied from minimal to marked at 7  
16 days p.i. and minimal to moderate at 14 days p.i. In some animals, serosal inflammation  
17 of the gastrointestinal tract extended into the subserosal connective tissue and smooth  
18 muscle. Inflammation of the gastric and intestinal muscular tunics was generally minimal  
19 to mild and more common in animals at 14 days p.i. At 7 days p.i., changes in the lungs  
20 were limited to patchy areas in which alveolar septa were mildly thickened with  
21 macrophages and occasional lymphocytes. At 14 days p.i. animals had moderate to  
22 marked interstitial pneumonia characterized by multifocal to coalescing accumulations  
23 of macrophages with fewer admixed neutrophils, lymphocytes, plasma cells and

24 scattered necrotic cellular debris that thickened alveolar septa and replaced air spaces.  
25 Many alveolar spaces were lined by hyperplastic type II pneumocytes and contained  
26 variable quantities and combinations of macrophages, lymphocytes, plasma cells,  
27 oedema fluid, and fibrin. Tachyzoites were identified in pulmonary epithelial cells,  
28 unidentified cells in the interstitium, and were found both free and within macrophages  
29 in alveolar spaces. At 7 days p.i., the myocardium of three of four animals contained  
30 rare minimal infiltrates of mononuclear cells and rare necrotic myofibers; in one animal a  
31 few tachyzoites were detected in association with a focus of inflammation. At 14 days  
32 p.i., a minimal to moderate multifocal nonsuppurative variably neutrophilic myocarditis  
33 and myonecrosis was present. Lesions in the heart were most pronounced in the  
34 myocardium but also involved the epicardium and endocardium. Intralesional  
35 tachyzoites were commonly found in areas of necrosis and tissue cysts were identified  
36 in three of four animals.

37 Histopathologic changes were consistently detected in all animals at both time  
38 points in the diaphragm, liver, and lymphoid tissues. Lesions in the diaphragm consisted  
39 of mild to moderate granulomatous myositis and myonecrosis with fibroplasia and  
40 mineralization seen at 14 days p.i. Intralesional tachyzoites were identified at 7 days p.i.  
41 in two of four animals while low numbers of tachyzoites and tissue cysts were only  
42 found in one animal at 14 days p.i. Hepatic lesions were minimal and consisted of  
43 scattered small random foci of coagulative necrosis associated with neutrophilic  
44 infiltrates at 7 days p.i. and small scattered clusters of mononuclear cells with rare  
45 admixed necrotic cellular debris at 14 days p.i. Tachyzoites were only rarely detected in  
46 the liver at 7 days p.i. in areas of necrosis and *T. gondii* antigen was identified by IHC in

47 sinusoidal Kupffer cells. At 7 days p.i., the spleen, mesenteric and thoracic lymph nodes  
48 had moderate to marked lymphoid hyperplasia characterized by large reactive lymphoid  
49 follicles with prominent germinal centers. Some lymph nodes also had mild to moderate  
50 sinusoidal histiocytosis. Additional findings at 14 days p.i. included prominent central  
51 lymphocytolysis in the majority of lymphoid follicles, minimal to moderate granulomatous  
52 lymphadenitis involving mesenteric and less commonly thoracic lymph nodes, and  
53 variable amounts of blood and oedema fluid within mesenteric lymph node sinuses.  
54 Similar lymphoid hyperplasia and inflammation was observed in submandibular and  
55 sublumbar lymph nodes available for evaluation. Tachyzoites were detected in areas of  
56 splenic and lymph node capsular inflammation and in the mesenteric lymph node  
57 sinuses of one animal at 7 days p.i. IHC staining revealed *T. gondii* antigen within rare  
58 cells in the spleen at 14 days p.i. in one animal and in multiple thoracic and mesenteric  
59 lymph nodes at both time points.

60 Additional light microscopic changes associated with *T. gondii* infection were  
61 more variable and included mild to moderate granulomatous to pyogranulomatous  
62 rarely necrotizing cystitis generally limited to serosal and smooth muscle layers (one of  
63 four animals at 7 days p.i. and three of four animals at 14 days p.i.), minimal necrotizing  
64 adrenalitis (three of four animals at 14 days p.i.), mild to moderate nonsuppurative to  
65 pyogranulomatous and necrotizing cholecystitis (two of four animals at 7 and 14 days  
66 p.i.), minimal to mild pancreatitis that varied from focal and nonsuppurative at 7 days p.i.  
67 (one of four animals) to granulomatous and necrotizing at 14 days p.i. (all animals),  
68 minimal to mild nonsuppurative glossitis (one animal at 7 days p.i. and four animals at  
69 14 days p.i.), focal minimal lymphoplasmacytic meningitis (one of four animals at 14

70 days p.i.), moderate suppurative ureteritis (one of four animals at 7 days p.i.), and mild  
71 focal granulomatous and necrotizing prostatitis limited to the serosa and subserosal  
72 smooth muscle (one animal at 14 days p.i.). Tachyzoites were occasionally identified in  
73 association with lesions in the smooth muscle layers of the stomach (one of four  
74 animals at 14 days p.i.), jejunum (one of four animals at 14 days p.i.), colon (all animals  
75 at 14 days p.i.), gall bladder (one of four animals at 7 and 14 days p.i.), and urinary  
76 bladder (one of four animals at 14 days p.i.). Tachyzoites were also identified in  
77 subvertebral skeletal muscle (three of four animals at 7 days p.i. and all animals at 14  
78 days p.i.), forelimb skeletal muscle (one animal at 14 days p.i.), pancreas (three of four  
79 animals at 14 days p.i.), and tongue (one animal at 7 days p.i.). Small numbers of tissue  
80 cysts were detected at 14 days p.i. in the diaphragm (one of four animals), perivertebral  
81 skeletal muscle (one of four animals), and urinary bladder (one of four animals), and a  
82 single cyst was identified in the kidney of one animal.

83 Sections of spinal cord, trachea, esophagus, elbow joint, bone, bone marrow,  
84 external ear, skin, brain, elbow joint, peripheral nerve, thyroid gland, pituitary gland (not  
85 consistently examined), thymus, testicle, and epididymis were histologically normal in *T.*  
86 *gondii* infected animals at 7 and 14 days p.i. or contained changes similar to uninfected  
87 control animals.

88 In *N. caninum* infected animals, predominant lesions in visceral tissues were  
89 necrosis followed by inflammation that varied from granulomatous to pyogranulomous  
90 with muscle, liver, lung, and pancreas most severely affected. Peritonitis was also a  
91 common feature and was usually most pronounced in the mesometrium, in the vicinity  
92 of genitourinary structures, and the gastroduodenal junction and pancreas. Overall,

93 histopathologic lesions were generally more widespread and severe in *N. caninum*  
94 infected animals than *T. gondii* infected animals at similar time points. Replicating  
95 tachyzoites were commonly identified both in association with lesions as well as in the  
96 absence of an appreciable inflammatory response and tissue cysts were confirmed by  
97 *T. gondii* BAG5 IHC (which cross reacts with *N. caninum* bradyzoites and cysts) in a  
98 wide range of tissues at 13 days p.i. but not at 7 days p.i.

99 Consistent with previous descriptions of neosporosis in dunnarts (2), some of the  
100 most striking lesions were in muscle and involved cardiac, striated, and smooth muscle.  
101 Heart lesions were seen in all animals and consisted of minimal focal to multifocal  
102 nonsuppurative myocarditis with minimal to mild myonecrosis at 7 days p.i. and  
103 moderate multifocal to coalescing nonsuppurative to pyogranulomatous myocarditis with  
104 moderate to severe myonecrosis at 13 days p.i. Intralesional tachyzoites were common  
105 and small numbers of tissue cysts were seen in all animals at 13 days p.i. Of sections of  
106 skeletal muscle evaluated, the diaphragm was most severely affected followed by  
107 subvertebral skeletal muscle. The diaphragm in all animals had multifocal to coalescing  
108 granulomatous to pyogranulomatous myositis and myonecrosis with intralesional  
109 tachyzoites that varied from mild to marked at 7 days p.i. to severe at 13 days p.i.  
110 Similar changes were consistently identified in the subvertebral musculature and were  
111 minimal to moderate at 7 days p.i. and moderate to severe at 13 days p.i. Tissue cysts  
112 were detected in the diaphragm of all animals at 13 days p.i. and in subvertebral muscle  
113 in three of four animals. In the tongue, minimal to moderate lymphoplasmacytic glossitis  
114 and minimal to mild myonecrosis was seen in all animals at 7 days p.i. and moderate to  
115 severe lymphoplasmacytic to granulomatous glossitis with moderate to severe

116 myonecrosis was evident in all animals at 13 days p.i. Intralesional tachyzoites were  
117 identified in two of four animals at 7 days p.i. and in all animals at 13 days p.i. Tissue  
118 cysts were seen in the tongue of three animals at 13 days p.i. Myositis and myonecrosis  
119 with intralesional tachyzoites were also seen in sections of periocular and forelimb  
120 skeletal muscle. Tissue cysts were identified in periocular muscle of two of four animals,  
121 four of four animals in forelimb skeletal muscle at 13 days p.i. Similar to *T. gondii*  
122 infected dunnarts, inflammatory infiltrates frequently extended from the serosal surface  
123 into muscular tunics of abdominal viscera. The urinary bladder and gall bladder were  
124 consistently and most severely affected. A multifocal to rarely transmural granulomatous  
125 to necrosuppurative cystitis was seen in all animals that varied from mild to moderate at  
126 7 days p.i. and mild to severe at 13 days p.i. Intralesional tachyzoites were common and  
127 replicating tachyzoites were also identified in the absence of a host response. Many  
128 tissue cysts were seen in the urinary bladder smooth muscle at 13 days p.i. The gall  
129 bladder had multifocal to transmural granulomatous to pyogranulomatous variably  
130 necrotizing cholecystitis with intralesional tachyzoites that was severe at 7 days p.i. and  
131 mild to severe at 13 days p.i. Histopathologic lesions in gastrointestinal smooth muscle  
132 were less consistent. Minimal to rarely moderate inflammation and necrosis associated  
133 with tachyzoites were found in smooth muscle of the stomach (three of four animals at 7  
134 days p.i. and all animals at 13 days p.i.), duodenum (two of four animals at 7 and 13  
135 days p.i.), jejunum (three of four animals at 7 days p.i. and all animals at 13 days p.i.),  
136 and colon (two of four animals at 7 days p.i. and three of four animals at 13 days p.i.). In  
137 the stomach, replicating tachyzoites were identified in parietal and chief cells and  
138 mucosal epithelial cells at 13 days p.i. Granulomatous to necrotizing esophagitis with



139 occasional intralesional tachyzoites predominately involved smooth muscle and varied  
140 from minimal to mild at 7 days p.i. (two of three animals) and minimal to marked at 13  
141 days p.i. (three of four animals). Lesions in the uterus were characterized by  
142 granulomatous to pyogranulomatous and necrotizing myometritis with intralesional  
143 zoites that varied from mild to moderate at 7 days p.i. (two of three animals) and was  
144 moderate and included endometritis at 13 days p.i. (2 of 3 animals). Lesions in the  
145 oviduct and ovary included a marked pyogranulomatous and necrotizing salpingitis  
146 involving smooth muscle with intralesional zoites (one of three animals at 7 and 14 days  
147 p.i.) and a moderate to marked granulomatous and necrotizing oophoritis at 13 days p.i.  
148 (two of three animals) with intralesional zoites identified in one animal. Smooth muscle  
149 of the vagina and cervix also contained mild to moderate granulomatous and necrotizing  
150 inflammation with occasional intralesional zoites at 13 days p.i. (two of three animals).  
151 Similar mild smooth muscle lesions were in the prostate and penis of one animal at 13  
152 days p.i.

153         Hepatic and pulmonary lesions were consistently identified in all animals. At 7  
154 days p.i., the liver contained multifocal random foci of acute necrosis consisting of  
155 admixed accumulations of fibrin, neutrophils, and necrotic cellular debris. These lesions  
156 correlated grossly with the red foci of discolored parenchyma noted at necropsy.  
157 Intralesional tachyzoites were occasionally detected in association with necrotic foci. At  
158 14 days p.i., extensive multifocal to coalescing hepatic necrosis with mild to moderate  
159 accumulations of mononuclear cells, neutrophils, fibrin, and hemorrhage was seen in all  
160 animals. Tachyzoites were found replicating within hepatocytes and biliary epithelial  
161 cells and were also found free in and within Kupffer cells in the sinusoids. Lesions in the

162 lungs at 7 days p.i. were characterized by minimal to mild thickening of alveolar septa  
163 with small numbers of macrophages and neutrophils, edema fluid, and occasional  
164 accumulations of fibrin. At 13 days p.i., all animals had a moderate to severe interstitial  
165 pneumonia characterized by diffuse expansion of alveolar septa with many  
166 macrophages and neutrophils, edema fluid, and fibrin. Alveolar histiocytosis, fibrin  
167 exudation and necrotic debris within alveoli, type II pneumocyte hyperplasia, hyaline  
168 membrane formation, pulmonary edema, and atelectasis were also evident. Tachyzoites  
169 were identified in alveolar septa, pneumocytes, and within alveoli both free and within  
170 macrophages.

171         The pancreas had nonsuppurative to pyogranulomatous and necrotizing  
172 pancreatitis that varied from focal and minimal to multifocal and mild at 7 days p.i. (three  
173 of four animals) and was multifocal to coalescing and minimal to marked at 13 days p.i.  
174 Intralesional tachyzoites were numerous in areas of necrosis and were also found  
175 replicating within acinar epithelial cells. Lesions in the brain at 7 days p.i were only  
176 identified in one animal and included minimal multifocal nonsuppurative to  
177 pyogranulomatous meningitis and minimal multifocal necrotizing encephalitis;  
178 intralesional tachyzoites were not identified. The pituitary gland of the same animal had  
179 a small focus of acute necrosis in the pars nervosa associated with intralesional  
180 tachyzoites. At 14 days p.i., minimal to mild nonsuppurative meningitis, nonsuppurative  
181 to necrotizing encephalitis with intralesional tachyzoites, and one to several tissue cysts  
182 were identified in all animals. Lesions in the spinal cord were seen in three of four  
183 animals at 13 days p.i. and consisted of rare minimal foci of necrosis and gliosis,  
184 minimal multifocal lymphoplasmacytic meningitis, and minimal to mild nonsuppurative

185 spinal ganglioneuritis. Rare intralesional tachyzoites were detected in association with  
186 these lesions and tissue cysts were identified in two animals.

187         With regards to lymphoid tissue, lymphoid hyperplasia was rarely apparent in  
188 dunnarts with neosporosis and when identified was generally minimal to mild. Multifocal  
189 granulomatous to pyogranulomatous and necrotizing splenitis was evident in all animals  
190 and varied from minimal to marked at 7 days p.i. and mild to marked at 13 days p.i.  
191 Intralesional tachyzoites were identified in two animals at 7 days p.i. and in all animals  
192 at 13 days p.i. At 13 days p.i., the spleen had extramedullary hematopoiesis beyond  
193 baseline levels characterized by a preponderance of myeloid precursors and increased  
194 numbers of megakaryocytes. The mesenteric lymph nodes had mild to marked  
195 granulomatous to pyogranulomatous variably necrotizing lymphadenitis (three of three  
196 animals at 7 days p.i., three of four animals at 13 days p.i.). The thoracic lymph node  
197 had similar marked lymphadenitis (one of one animal at 7 days p.i., three of three  
198 animals at 13 days p.i.) as did other lymph nodes when available for evaluation.

199         Additional histopathologic lesions associated with *N. caninum* infection included  
200 minimal to mild nonsuppurative and necrotizing sialoadenitis with intralesional  
201 tachyzoites and replicating tachyzoites in acinar epithelial cells (three of four at 7 days  
202 p.i. and 13 days p.i.), necrotizing adrenalitis with intralesional tachyzoites (minimal in  
203 one of three animals at 7 days p.i., moderate in three of four animals at 13 days p.i.),  
204 moderate pyogranulomatous and necrotizing ureteritis (one of four animals at 7 days p.i.  
205 and one of three animals at 13 days p.i.), pyogranulomatous pyelonephritis (one of four  
206 animals at 13 days p.i.), and mild focal to multifocal granulomatous and necrotizing  
207 thyroiditis with intralesional tachyzoites and rare replicating tachyzoites in follicular

208 epithelial cells (two of two animals at 13 days p.i.), focal granulomatous epididymitis  
209 (one of one animal at 13 days p.i.), and marked atrophy of tail adipose tissue (four of  
210 four animals at 13 days p.i.). In addition to the tissues listed above, small numbers of  
211 tachyzoites were also identified in the bone marrow in megakaryocytes and myeloid  
212 precursors in *N. caninum* infected animals at 13 days p.i. Tissue cysts were identified at  
213 13 days p.i. in the colonic muscularis (one animal), pancreas (one animal), cranial nerve  
214 ganglion (one animal), adrenal gland (two animals), penis musculature (one animal),  
215 and prostate smooth muscle (one animal). Sections of spinal cord, peripheral nerve,  
216 trachea, thyroid gland, thymus, testicle, ovary, and elbow joint in dunnarts at 7 days p.i.  
217 and the thymus of dunnarts at 13 days p.i. were histologically normal. One animal at 13  
218 days p.i. had a focal granulomatous epididymitis and another had a mild nonsuppurative  
219 synovitis of the shoulder joint; however, intralesional tachyzoites were not identified and  
220 the association of these lesions to parasite infection could not be established.

221

## 222 **References**

- 223 1. **Dubey JP.** 2010. Toxoplasmosis of animals and humans, 2nd ed. CRC Press,  
224 Boca Raton.
- 225 2. **King JS, McAllan B, Spielman DS, Lindsay SA, Hurkova-Hofmannova L,**  
226 **Hartigan A, Al-Qassab SE, Ellis JT, Slapeta J.** 2011. Extensive production of  
227 *Neospora caninum* tissue cysts in a carnivorous marsupial succumbing to  
228 experimental neosporosis. Vet Res **42**:75.

229

**Figure S1**

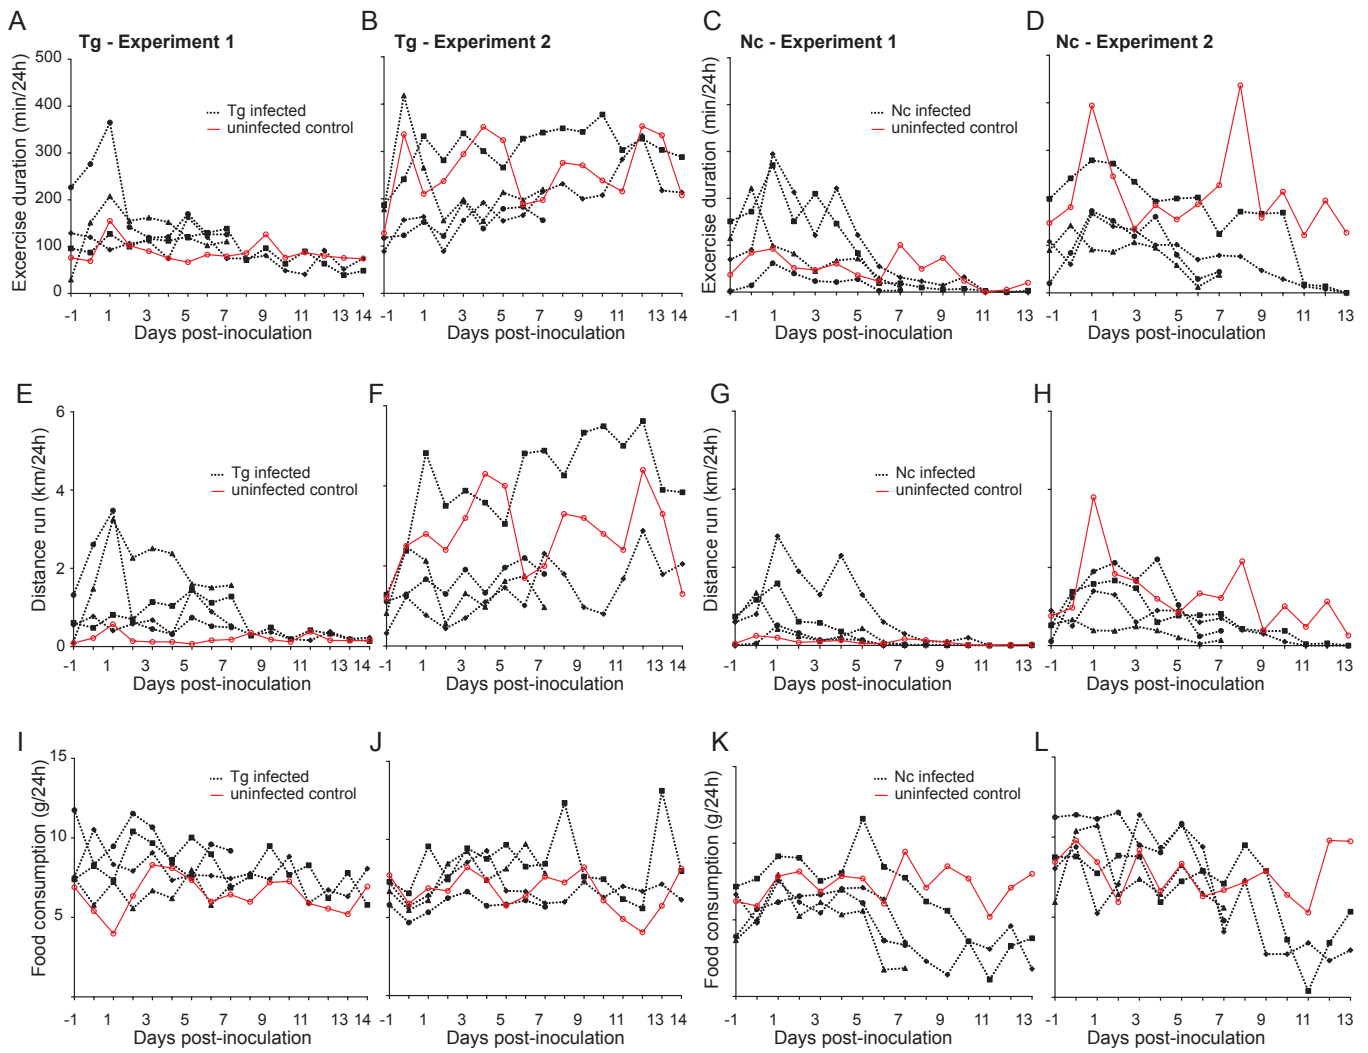

**Supplementary Figure 1:** Daily activity and food consumption of fat-tailed dunnarts (*Sminthopsis crassicaudata*) during *Neospora caninum* and *Toxoplasma gondii* infection. Data shown are representative of two independent *T. gondii* experiments (Tg1: A, E, I; Tg2: B, F, J) and two independent *N. caninum* experiments (Nc1: C, G, K; Nc2: D, H, L). Activity and food consumption of all experimental animals was individually monitored and is presented as a daily sum. Daily activity was measured on an exercise wheel equipped with a wheel odometer that translated the number of revolutions in 24 hours into distance in kilometers (C, D, I, J) and time spent in the wheel (A, B, G, H). Food consumption reflects the total grams of food consumed in 24 hours (E, F, K, L). Uninfected control animals are designated by a red line connecting data points.

**TABLE S1** Summary of parasite infection experiments in the fat-tailed dunnart (*Sminthopsis crassicaudata*)

| Experiment | Parasite          | Identification           | Sex | Euthanasia (days p.i.) | MAT/cELISA (%) <sup>a</sup> |
|------------|-------------------|--------------------------|-----|------------------------|-----------------------------|
| Tg1        | <i>T. gondii</i>  | Tg1A                     | M   | 7                      | Neg.                        |
|            |                   | Tg1B                     | M   | 7                      | Neg.                        |
|            |                   | Tg1C                     | M   | 14                     | Pos.                        |
|            |                   | Tg1D                     | M   | 14                     | Pos. <sup>c</sup>           |
|            |                   | Tg1-control <sup>b</sup> | F   | 14                     | Neg.                        |
| Tg2        | <i>T. gondii</i>  | Tg2A                     | M   | 7                      | Neg.                        |
|            |                   | Tg2B                     | M   | 7                      | Neg.                        |
|            |                   | Tg2C                     | M   | 14                     | Pos.                        |
|            |                   | Tg2D                     | M   | 14                     | Pos. <sup>c</sup>           |
|            |                   | Tg2-control <sup>b</sup> | F   | 14                     | NT                          |
| Nc1        | <i>N. caninum</i> | Nc1A                     | F   | 7                      | Neg. (7%)                   |
|            |                   | Nc1B                     | M   | 7                      | Neg. (24%)                  |
|            |                   | Nc1C                     | F   | 13 <sup>d</sup>        | Pos. (39%)                  |
|            |                   | Nc1D                     | M   | 13 <sup>d</sup>        | Pos. (59%)                  |
|            |                   | Nc1-control <sup>b</sup> | M   | 13                     | Neg. (13%)                  |
| Nc2        | <i>N. caninum</i> | Nc2A                     | F   | 7                      | Neg. (3%)                   |
|            |                   | Nc2B                     | F   | 7                      | Neg. (16%)                  |
|            |                   | Nc2C                     | F   | 13 <sup>d</sup>        | Pos. (62%)                  |
|            |                   | Nc2D                     | F   | 13 <sup>d</sup>        | Neg. (12%)                  |
|            |                   | Nc2-control <sup>b</sup> | F   | 13                     | Neg. (13%)                  |

<sup>a</sup> cELISA and MAT were used to detect *N. caninum* and *T. gondii* antibodies, respectively

<sup>b</sup> negative control animal

<sup>c</sup> weak positive MAT reaction

<sup>d</sup> animal euthanized due to clinical neosporosis for animal welfare reasons

Note. cELISA, competitive enzyme-linked immunosorbent assay; MAT, modified agglutination test; NT, not tested; p.i., postinfection

**TABLE S2** Primers used in this study

| Gene                         | Primers (5'-3')                                           | T (°C)<br>Annealing | Amplicon size<br>(bp) | Reference                              |
|------------------------------|-----------------------------------------------------------|---------------------|-----------------------|----------------------------------------|
| Nc5<br>( <i>N. caninum</i> ) | F: ACTGGAGGCACGCTGAACAC<br>R: AACAAATGCTTCGCAAGAGGAA      | 60                  | 76                    | E. Collantes-Fernandez et al., 2002(1) |
| SAG1<br>( <i>T. gondii</i> ) | F: CTGATGTCGTTCTTGCGATGTGGC<br>R: GTGAAGTGGTTCTCCGTCGGTGT | 60                  | 128                   | Yu et al., 2013(2)                     |
| GAPDH*                       | F: AACTTTGGCATTGTGGAAGGA<br>R: GTGGAAGCAGGGATGATGTT       | 57                  | 134                   | Maher et al., 2014(3)                  |
| 28S*                         | F: CGATGTCGGCTCTTCCTATC<br>R: TCCTCAGCCAAGCACATACA        | 60                  | 205                   | Daly et al., 2009(4)                   |
| TNF- $\alpha$                | F: TGATACCTGCCTCTGGACTTTAC<br>R: GCTTCTCTTGTTGCCTTCTGG    | 60                  | 178                   | This study                             |
| IL-6                         | F: AAATCCAGCATCGGGCAGTG<br>R: AAATCTTGTTCTTCAGGTCAGTAGC   | 57                  | 91                    | This study                             |
| IL-4                         | F: ACTGTTGCCACTTTGTTGATAGA<br>R: GCTTCGGCAGTTTCTTCTCT     | 60                  | 125                   | This study                             |
| IFN- $\gamma$                | F: TGGAGCATATCAAAGAGGACAT<br>R: GGGTGAGAAGTTACGGAAGAC     | 60                  | 161                   | This study                             |
| IL-17A                       | F: GTGCCGTCATTCAGGTTGC<br>R: GGTGACACAGGTACATCCTACAG      | 60                  | 166                   | This study                             |

Note. An asterisk denotes primers used as reference genes



## References

1. **Collantes-Fernandez E, Zaballos A, Alvarez-Garcia G, Ortega-Mora LM.** 2002. Quantitative detection of *Neospora caninum* in bovine aborted fetuses and experimentally infected mice by real-time PCR. *J Clin Microbiol* **40**:1194-1198.
2. **Yu H, Huang B, Zhuo X, Chen X, Du A.** 2013. Evaluation of a real-time PCR assay based on the single-copy SAG1 gene for the detection of *Toxoplasma gondii*. *Vet Parasitol* **197**:670-673.
3. **Maher IE, Griffith JE, Lau Q, Reeves T, Higgins DP.** 2014. Expression profiles of the immune genes CD4, CD8beta, IFNgamma, IL-4, IL-6 and IL-10 in mitogen-stimulated koala lymphocytes (*Phascolarctos cinereus*) by qRT-PCR. *PeerJ* **2**:e280.
4. **Daly KA, Mailer SL, Digby MR, Lefevre C, Thomson P, Deane E, Nicholas KR, Williamson P.** 2009. Molecular analysis of tammar (*Macropus eugenii*) mammary epithelial cells stimulated with lipopolysaccharide and lipoteichoic acid. *Vet Immunol Immunopathol* **129**:36-48.

**TABLE S3** Optimization values for qPCR assays used in this study

| Gene          | Efficiency | Conc (nM) | Linear dynamic range (orders of magnitude) | LOQ (copies/qPCR reaction) | Cq at LOQ | LOD (copies/qPCR reaction) | r <sup>2</sup> calibration curve | Slope  | y-intercept |
|---------------|------------|-----------|--------------------------------------------|----------------------------|-----------|----------------------------|----------------------------------|--------|-------------|
| Nc5           | 0.991      | 1000      | 7                                          | 6                          | 31        | <1                         | 1.000                            | -3.343 | 33.733      |
| SAG1          | 0.980      | 400       | 8                                          | 18                         | 35        | 2                          | 0.997                            | -3.371 | 38.865      |
| GAPDH         | 0.974      | 500       | 8                                          | 8                          | 36        | 1                          | 0.998                            | -3.385 | 41.681      |
| 28S           | 0.993      | 250       | 9                                          | 4                          | 35        | <1                         | 0.999                            | -3.340 | 38.582      |
| TNF- $\alpha$ | 0.985      | 500       | 8                                          | 461                        | 35        | 30                         | 0.997                            | -3.358 | 41.198      |
| IL-6          | 0.985      | 500       | 8                                          | 722                        | 35        | 72                         | 0.996                            | -3.359 | 43.725      |
| IL-4          | 0.987      | 250       | 9                                          | 3580                       | 37        | 358                        | 0.996                            | -3.354 | 46.176      |
| IFN- $\gamma$ | 0.990      | 500       | 9                                          | 37                         | 36        | 6                          | 0.999                            | -3.346 | 37.754      |
| IL-17A        | 0.983      | 500       | 9                                          | 2                          | 36        | 2                          | 0.998                            | -3.363 | 38.423      |

Notes. Conc, primer concentration (nM); LOQ, limit of quantification; LOD, limit of detection

**TABLE S4** Summary of histopathology lesion grading scores for inflammation, necrosis, and parasite life stage in *Neospora caninum* and *Toxoplasma gondii* infected fat-tailed dunnarts (*Sminthopsis crassicaudata*)

| Tissue and histopathology | Results <sup>a</sup> |                                      |         |                                     |         |
|---------------------------|----------------------|--------------------------------------|---------|-------------------------------------|---------|
|                           | Control              | <i>N. caninum</i> days postinfection |         | <i>T. gondii</i> days postinfection |         |
|                           |                      | 7                                    | 13      | 7                                   | 14      |
| <b>Brain</b>              |                      |                                      |         |                                     |         |
| Inflammation              | 0,0,0,0              | 0,0,1,0                              | 1,1,2,1 | 0,0,0,0                             | 0,1,0,0 |
| Necrosis                  | 0,0,0,0              | 0,0,1,0                              | 1,1,2,1 | 0,0,0,0                             | 0,0,0,0 |
| Parasite life stage       | 0,0,0,0              | 0,0,0,0                              | 1,1,3,3 | 0,0,0,0                             | 0,1,0,0 |
| <b>Tongue</b>             |                      |                                      |         |                                     |         |
| Inflammation              | 0,0,1,0              | 1,2,3,1                              | 3,3,4,3 | 1,2,0,1                             | 1,1,2,2 |
| Necrosis                  | 0,0,0,0              | 1,1,2,1                              | 3,3,4,3 | 1,2,0,1                             | 1,0,1,1 |
| Parasite life stage       | 0,0,0,0              | 0,1,1,0                              | 1,3,1,1 | 0,1,0,0                             | 0,0,0,0 |
| <b>Lung</b>               |                      |                                      |         |                                     |         |
| Inflammation              | 0,1,0,1              | 2,3,2,3                              | 4,3,4,4 | 3,2,2,2                             | 4,4,3,3 |
| Necrosis                  | 0,0,0,0              | 1,2,2,2                              | 4,4,4,4 | 1,2,2,2                             | 2,3,3,2 |
| Parasite life stage       | 0,0,0,0              | 1,1,1,1                              | 1,1,1,1 | 0,0,0,0                             | 0,1,1,1 |
| <b>Heart</b>              |                      |                                      |         |                                     |         |
| Inflammation              | 0,1,0,0              | 1,1,1,1                              | 3,3,3,3 | 1,2,1,1                             | 2,3,2,1 |
| Necrosis                  | 0,0,0,0              | 1,2,2,1                              | 4,4,4,3 | 1,1,1,0                             | 2,3,3,1 |
| Parasite life stage       | 0,0,0,0              | 1,1,1,1                              | 3,3,3,1 | 0,1,0,0                             | 1,3,3,1 |
| <b>Liver</b>              |                      |                                      |         |                                     |         |
| Inflammation              | 0,0,0,1              | 3,3,3,2                              | 4,2,4,3 | 1,1,1,2                             | 1,1,1,1 |
| Necrosis                  | 0,0,0,0              | 3,3,3,3                              | 4,2,4,4 | 1,1,1,2                             | 0,0,1,1 |
| Parasite life stage       | 0,0,0,0              | 1,1,1,1                              | 1,1,1,1 | 1,1,0,1                             | 0,0,0,0 |
| <b>Spleen</b>             |                      |                                      |         |                                     |         |
| Inflammation              | 0,0,0,0              | 3,1,4,2                              | 3,2,4,2 | 1,0,0,3                             | 1,1,1,2 |
| Necrosis                  | 0,0,0,0              | 2,2,3,1                              | 3,3,3,1 | 0,0,0,3                             | 0,0,0,0 |
| Parasite life stage       | 0,0,0,0              | 1,0,1,0                              | 1,1,1,1 | 1,0,0,1                             | 1,0,0,0 |

<sup>a</sup>For the evaluated sectional area of each tissue, the extent of inflammation and necrosis were semiquantitatively ranked with scores ranging from no lesion present (score = 0) to minimal (<5% affected; score = 1), mild (5-10% affected; score = 2), moderate (11-30% affected; score = 3), or severe (>30% affected; score = 4). To evaluate for the presence of different parasite life stages, scoring ranged from none present (score = 0) to tachyzoites only (score = 1), tissue cysts only (score = 2), or tachyzoites and tissue cysts (score = 3). The presence of tissue cysts was confirmed using bradyzoite specific BAG5 IHC.

**TABLE S5** Summary of tissue parasite load (no. parasites/100ng DNA) in fat-tailed dunnarts (*Sminthopsis crassicaudata*) infected with *Neospora caninum* and *Toxoplasma gondii* at 1 and 2 weeks postinfection

| Tissue | Parasite                                                                  |                                                                           | <i>T. gondii</i>                                                          |                                                                           |
|--------|---------------------------------------------------------------------------|---------------------------------------------------------------------------|---------------------------------------------------------------------------|---------------------------------------------------------------------------|
|        | <i>N. caninum</i><br>7 days p.i.                                          | 13 days p.i.                                                              | 7 days p.i.                                                               | 14 days p.i.                                                              |
| Brain  | 9.14 (5.71 - 4.19 × 10 <sup>1</sup> )                                     | 1.36 × 10 <sup>3</sup> (6.01 × 10 <sup>2</sup> - 1.87 × 10 <sup>3</sup> ) | 0.00 (0.00 - 0.00)                                                        | 0.00 (0.00 - 1.88 × 10 <sup>2</sup> )                                     |
| Tongue | 3.38 × 10 <sup>2</sup> (7.87 × 10 <sup>1</sup> - 7.95 × 10 <sup>2</sup> ) | 1.71 × 10 <sup>4</sup> (1.18 × 10 <sup>4</sup> - 2.58 × 10 <sup>4</sup> ) | 1.42 × 10 <sup>1</sup> (0.00 - 1.10 × 10 <sup>2</sup> )                   | 2.65 × 10 <sup>1</sup> (0.00 - 6.63 × 10 <sup>1</sup> )                   |
| Lung   | 1.84 × 10 <sup>3</sup> (7.91 × 10 <sup>2</sup> - 4.17 × 10 <sup>3</sup> ) | 2.57 × 10 <sup>4</sup> (1.76 × 10 <sup>4</sup> - 3.52 × 10 <sup>4</sup> ) | 8.84 × 10 <sup>1</sup> (4.74 × 10 <sup>1</sup> - 1.53 × 10 <sup>2</sup> ) | 4.18 × 10 <sup>2</sup> (1.01 × 10 <sup>2</sup> - 6.33 × 10 <sup>2</sup> ) |
| Heart  | 5.57 × 10 <sup>3</sup> (2.08 × 10 <sup>3</sup> - 1.09 × 10 <sup>4</sup> ) | 1.90 × 10 <sup>5</sup> (8.24 × 10 <sup>4</sup> - 3.02 × 10 <sup>5</sup> ) | 3.81 × 10 <sup>1</sup> (2.86 × 10 <sup>1</sup> - 8.68 × 10 <sup>1</sup> ) | 2.45 × 10 <sup>3</sup> (4.46 × 10 <sup>2</sup> - 5.70 × 10 <sup>3</sup> ) |
| Liver  | 1.89 × 10 <sup>3</sup> (6.04 × 10 <sup>2</sup> - 8.30 × 10 <sup>3</sup> ) | 2.54 × 10 <sup>4</sup> (7.74 × 10 <sup>3</sup> - 3.22 × 10 <sup>4</sup> ) | 2.35 × 10 <sup>2</sup> (2.93 × 10 <sup>1</sup> - 4.60 × 10 <sup>2</sup> ) | 0.00 (0.00 - 1.54 × 10 <sup>1</sup> )                                     |
| Spleen | 7.93 × 10 <sup>1</sup> (3.27 × 10 <sup>1</sup> - 4.27 × 10 <sup>2</sup> ) | 2.24 × 10 <sup>3</sup> (8.88 × 10 <sup>2</sup> - 5.30 × 10 <sup>3</sup> ) | 1.00 × 10 <sup>1</sup> (0.00 - 3.05 × 10 <sup>1</sup> )                   | 2.13 × 10 <sup>1</sup> (3.21 - 3.24 × 10 <sup>1</sup> )                   |

Note. Parasite numbers represent group median value (interquartile range) based on 4 biological replicates. Data shown are representative of two independent *T. gondii* experiments and two independent *N. caninum* experiments. p.i., postinfection.

**TABLE S6** Summary of cytokine mRNA expression in the spleen of fat-tailed dunnarts (*Sminthopsis crassicaudata*) at one and two weeks postinfection with *Toxoplasma gondii* and *Neospora caninum*

| Group                            | Fold change              |                          |                         |                         |                          |
|----------------------------------|--------------------------|--------------------------|-------------------------|-------------------------|--------------------------|
|                                  | IFN- $\gamma$ expression | TNF- $\alpha$ expression | IL-4 expression         | IL-6 expression         | IL-17A expression        |
| Control                          | 1.182 (0.6193 - 1.504)   | 0.7927 (0.584-0.88)      | 0.9841 (0.881 - 1.158)  | 1.068 (0.5807 - 1.762)  | 1.546 (0.3642 - 3.353 0  |
| <i>N. caninum</i> , 7 days p.i.  | 40.16 (29.94 - 44.06)    | 2.678 (2.127-4.723)      | 0.6851 (0.6685 - 1.974) | 0.8932 (0.6322 - 1.219) | 5.736 (1.025 - 21.29)    |
| <i>T. gondii</i> , 7 days p.i.   | 49.27 (37.6 - 73.14)     | 2.532 (1.657 - 4.926)    | 1.35 (0.9337 - 1.66)    | 1.333 (0.7734 - 4.044)  | 0.4604 (0.0504 - 0.9412) |
| <i>N. caninum</i> , 13 days p.i. | 117.5 (28.74 - 159.9)    | 3.072 (1.878 - 4.05)     | 2.768 (2.003 - 3.612 )  | 0.8932 (0.6322 - 1.219) | 2.027 (0.7897 - 15.71)   |
| <i>T. gondii</i> , 14 days p.i.  | 283.7 (235 - 366.5)      | 6.206 (3.994 - 7.63)     | 2.232 (1.01 - 3.012)    | 1.323 (1.148 - 1.773)   | 0.4291 (0.0244 - 1.424)  |

Note. Data are group median values (interquartile ranges) based on four biological replicates. Data shown are representative of two independent *T. gondii* experiments and two independent *N. caninum* experiments. Control, uninfected dunnarts; p.i., postinfection.
